# Supplementary material for: Curcumin alleviates LPS-induced inflammation and oxidative stress in mouse microglial BV2 cells by targeting miR-137-3p/NeuroD1
Source: Royal Society of Chemistry journal article supplement (doi:10.1039/c9ra07266g), 2019-01-01

Supplementary Fig. 1 Effects of curcumin and LPS on BV2 cells. MTT assay examined cell viability of BV2 cells treated with LPS and curcumin or not for 48 h. 1  $\mu\text{g}/\text{ml}$  of LPS was utilized to induce cell injury, and 10  $\mu\text{M}$  of curcumin was selected to protect LPS-evoked cell injury in BV2 cells.

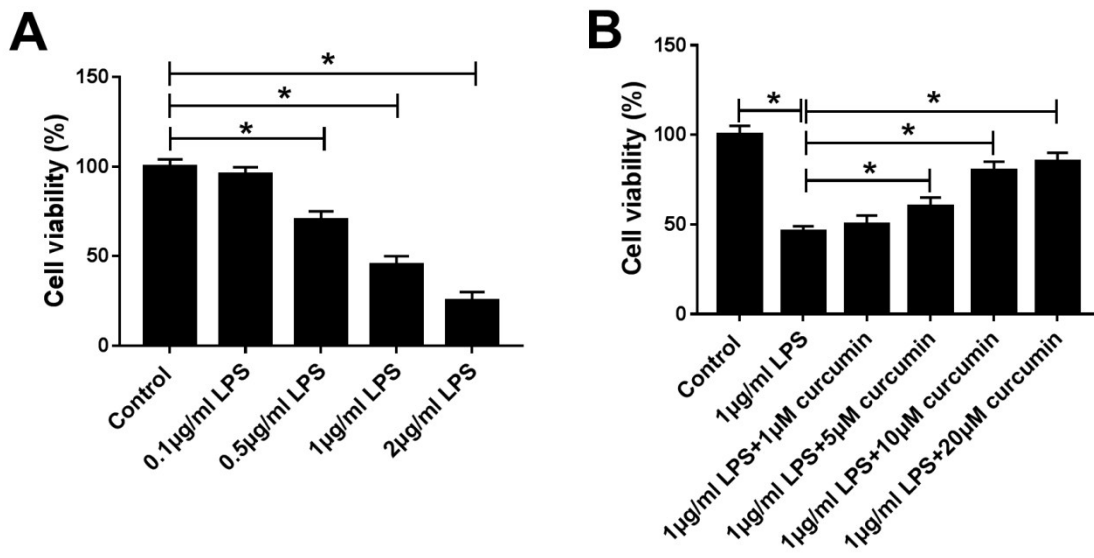

Supplement: c9ra07266g1.pdf [file c9ra07266g1.pdf]
